# Supplementary material for: Impact of Reaction Parameters and Water Matrices on the Removal of Organic Pollutants by TiO2/LED and ZnO/LED Heterogeneous Photocatalysis Using 365 and 398 nm Radiation
Source: MDPI journal article supplement (doi:10.3390/nano12010005), 2021-12-21
Supplement: s1 [file s1]

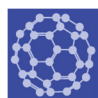

## Article

# Impact of Reaction Parameters and Water Matrices on the Removal of Organic Pollutants by TiO<sub>2</sub>/LED and ZnO/LED Heterogeneous Photocatalysis Using 365 and 398 nm Radiation

Máté Náfrádi <sup>1</sup>, Tünde Alapi <sup>1,\*</sup>, Gábor Bencsik <sup>2</sup> and Csaba Janáky <sup>2</sup>

<sup>1</sup> Department of Inorganic and Analytical Chemistry, University of Szeged, Dóm tér 7., H-6720 Szeged, Hungary; nafradim@chem.u-szeged.hu

<sup>2</sup> Department of Physical Chemistry and Materials Science, University of Szeged, Rerrich Béla tér 1., H-6720 Szeged, Hungary; bencsikg@chem.u-szeged.hu (G.B.); janaky@chem.u-szeged.hu (C.J.)

\* Correspondence: alapi@chem.u-szeged.hu

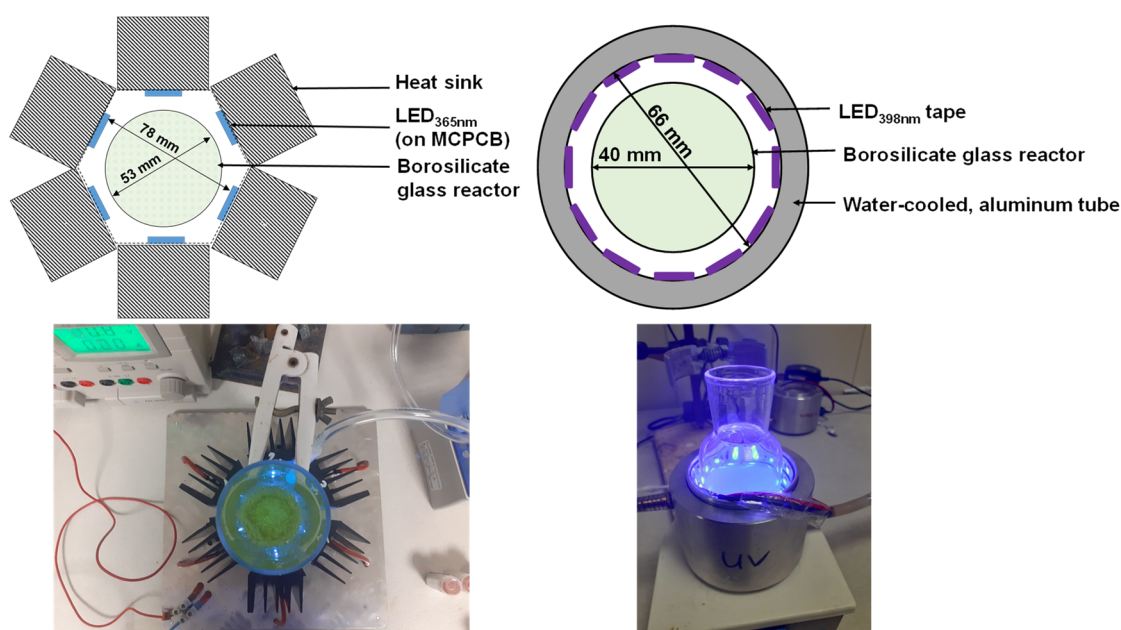

**Figure S1.** The schematic figures and photos of the photoreactors (left: LED<sub>365nm</sub>, right: LED<sub>398nm</sub>).

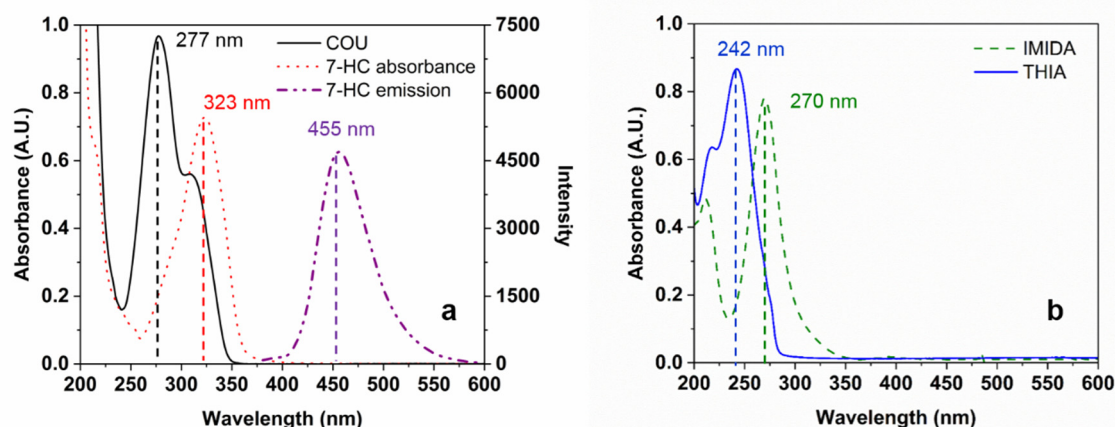

**Figure S2.** UV-Vis absorption and emission spectra of COU and 7-HC (a), and the UV-Vis absorption spectra of IMIDA and THIA (b).

**Table S1.** The list of used chemicals, their distributors and purity.

| Chemical                                                            | Distributor                        | Purity               |
|---------------------------------------------------------------------|------------------------------------|----------------------|
| coumarin                                                            | Sigma Aldrich (St.Louis, USA)      | 99%                  |
| 7-hydroxycoumarin                                                   | Sigma Aldrich (St.Louis, USA)      | 99%                  |
| imidacloprid                                                        | VWR (Radnor, USA)                  | 98%                  |
| thiacloprid                                                         | Sigma Aldrich (St.Louis, USA)      | 99%                  |
| NaCl                                                                | VWR (Radnor, USA)                  | 99%                  |
| NaHCO <sub>3</sub>                                                  | VWR (Radnor, USA)                  | 99%                  |
| HCl                                                                 | Sigma Aldrich (St.Louis, USA)      | 98%                  |
| NaOH                                                                | VWR (Radnor, USA)                  | 99%                  |
| Catalase (bovine liver)                                             | Sigma Aldrich (St.Louis, USA)      | >55% protein content |
| Fe <sub>2</sub> (SO <sub>4</sub> ) <sub>3</sub> × nH <sub>2</sub> O | VWR (Radnor, USA)                  | 98%                  |
| K <sub>2</sub> C <sub>2</sub> O <sub>4</sub>                        | Reanal (Budapest, Hungary)         | 98%                  |
| 1,4-phenantroline                                                   | Sigma Aldrich (St.Louis, USA)      | 99%                  |
| TiO <sub>2</sub>                                                    | Acros Organics (Geel, Belgium)     | 99.5%                |
| ZnO                                                                 | Sigma Aldrich (St.Louis, USA)      | 80%                  |
| N <sub>2</sub>                                                      | Messer Hungary (Budapest, Hungary) | 99.995%              |
| Synthetic air                                                       | Messer Hungary (Budapest, Hungary) | Medical grade        |
| MeOH                                                                | VWR (Radnor, USA)                  | 99.8%                |
| H <sub>2</sub> O                                                    | Merck-Millipore (Burlington, USA)  | ultrapure            |

Table S2. The parameters of the matrices.

| Parameter                                        | Tap Water | Biologically Treated Domestic Wastewater |
|--------------------------------------------------|-----------|------------------------------------------|
| pH                                               | 7.4       | 7.8                                      |
| Conductivity ( $\mu\text{S cm}^{-1}$ )           | 627       | 1258                                     |
| COD ( $\text{mg dm}^{-3}$ )                      | 4.2       | 24.4                                     |
| $\text{NH}_4^+\text{-N}$ ( $\text{mg dm}^{-3}$ ) | <0.4      | <0.4                                     |
| $\text{NO}_3^-$ ( $\text{mg dm}^{-3}$ )          | <0.7      | 3.37                                     |
| $\text{Cl}^-$ ( $\text{mg dm}^{-3}$ )            | 8.75      | 120                                      |
| TOC ( $\text{mg dm}^{-3}$ )                      | 0.79      | 6.9                                      |
| Inorganic carbon * ( $\text{mg dm}^{-3}$ )       | 73.4      | 103.4                                    |

\* Dissolved  $\text{CO}_2$ ,  $\text{HCO}_3^-$  and  $\text{CO}_3^{2-}$ .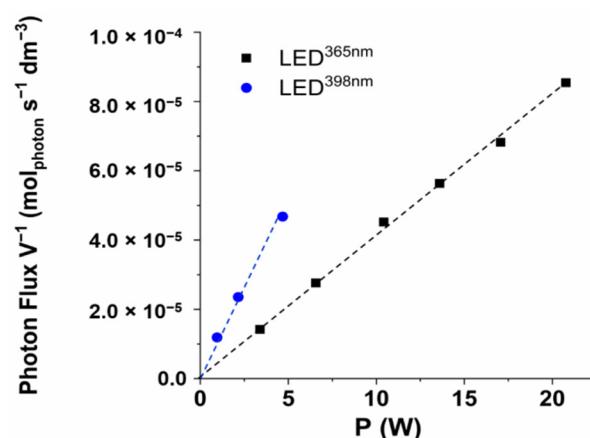

Figure S3. The photon flux of the LEDs as a function of electric power input.

Table S3. The photon flux of the light sources and the calculated electric efficiencies.

| Light Source         | Photon Flux ( $\text{mol}_{\text{photon}} \text{s}^{-1}$ ) | $P_{\text{electric}}$ (W) | $E_{\text{photon}}^*$ (eV) | $P_{\text{radiant}}$ (W) | Electric Efficiency $P_{\text{radiant}}/P_{\text{electric}}$ |
|----------------------|------------------------------------------------------------|---------------------------|----------------------------|--------------------------|--------------------------------------------------------------|
| LED <sup>365nm</sup> | $2.83 \times 10^{-6}$                                      | 3.39                      | 3.38                       | 0.93                     | 0.27                                                         |
|                      | $5.52 \times 10^{-6}$                                      | 6.56                      | 3.38                       | 1.80                     | 0.27                                                         |
|                      | $1.13 \times 10^{-5}$                                      | 13.60                     | 3.38                       | 3.67                     | 0.27                                                         |
|                      | $1.71 \times 10^{-5}$                                      | 20.77                     | 3.38                       | 5.58                     | 0.27                                                         |
| LED <sup>398nm</sup> | $1.19 \times 10^{-6}$                                      | 0.96                      | 3.12                       | 0.36                     | 0.37                                                         |
|                      | $2.35 \times 10^{-6}$                                      | 2.16                      | 3.12                       | 0.71                     | 0.33                                                         |
|                      | $4.68 \times 10^{-6}$                                      | 4.68                      | 3.12                       | 1.41                     | 0.30                                                         |

\* Nominal value calculated for  $\lambda_{\text{max}}$ .

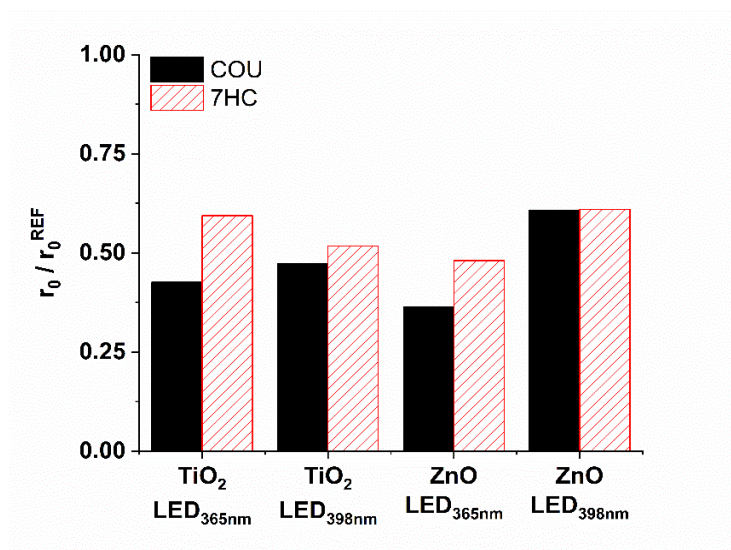

**Figure S4.** The effect of  $5.0 \times 10^{-3}$  M MeOH on the transformation rate of COU and the formation rate of 7-HC.

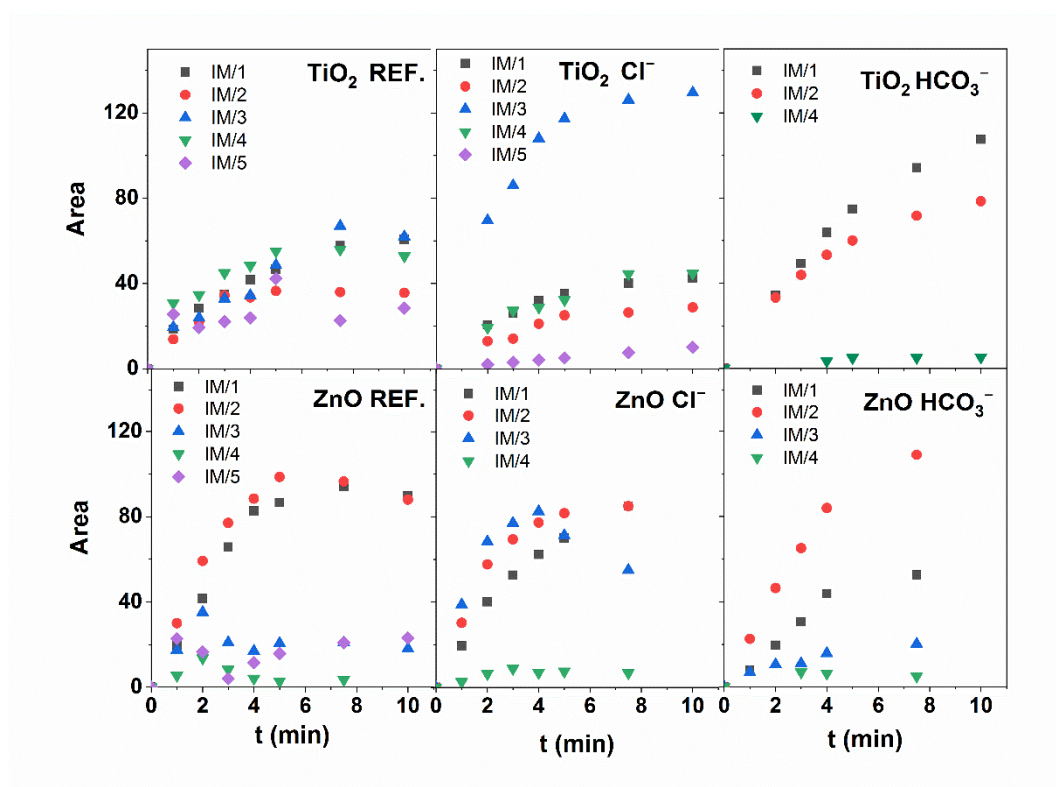

**Figure S5.** The effect of inorganic ions on the products of IMIDA detected by HPLC-DAD during treatment using LED<sub>365nm</sub>.

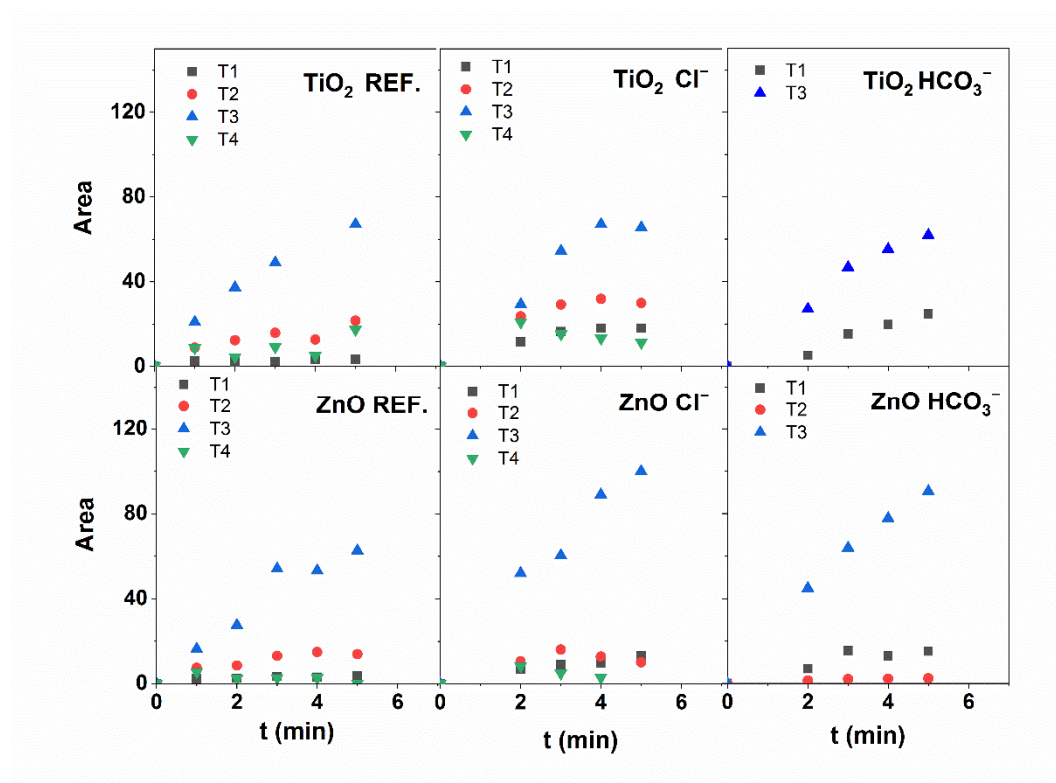

**Figure S6.** The effect of inorganic ions on the products of THIA detected by HPLC-DAD during treatment using LED<sub>365nm</sub>.

**Table S4.** The inorganic standard electrode potentials of the ions and radical ions [105].

| Half Reaction                                         | Electrode Potential/V |
|-------------------------------------------------------|-----------------------|
| $O_2(aq) + e^- \rightarrow O_2^{\bullet}$             | −0.18                 |
| $O_2(aq) + H^+ + e^- \rightarrow HO_2^{\bullet}$      | +0.10                 |
| $HO_2^{\bullet} + H^+ + e^- \rightarrow H_2O_2$       | +1.46                 |
| $HO^{\bullet} + e^- + H^+ \rightarrow H_2O$           | +2.730                |
| $HO^{\bullet} + e^- \rightarrow OH^-$                 | +1.902                |
| $Cl^{\bullet} + e^- \rightarrow Cl^-$                 | +2.432                |
| $Cl_2^{\bullet-} + e^- \rightarrow 2 Cl^-$            | +2.126                |
| $HOCl + e^- \rightarrow ClOH^{\bullet-}$              | +0.25                 |
| $ClOH^{\bullet-} + e^- \rightarrow Cl^- + OH^-$       | +1.912                |
| $ClOH^{\bullet-} + e^- + H^+ \rightarrow Cl^- + H_2O$ | +2.740                |
| $NO_3^{\bullet} + e^- \rightarrow NO_3^-$             | +2.466                |
| $NO_2^{\bullet} + e^- \rightarrow NO_2^-$             | +1.04                 |
| $CO_2^{\bullet-} + H^+ + e^- \rightarrow CO_3^{2-}$   | +1.52                 |
| $CO_3^{\bullet-} + e^- \rightarrow HCO_2^-$           | +1.57                 |
